# Supplementary material for: Comparative Genomic Analysis ofLactobacillus plantarum: An Overview
Source: Hindawi journal article supplement (doi:10.1155/2019/4973214), 2019-04-10
Supplement: f1 [file 4973214.f1.pdf]

Table S1. Characteristics of the 50 *Lactobacillus*

used in this study.

| Organism name                      | Isolation source                                       | Access Number | References  |
|------------------------------------|--------------------------------------------------------|---------------|-------------|
| <i>Lactobacillus pentosus</i> KCA1 | Vagina– Nigeria                                        | NZ_CM001538.1 | 1           |
| <i>L. plantarum</i> 10CH           | Cheese- United Kingdom                                 | CP023728.1    | 2           |
| <i>L. plantarum</i> 16             | Isolated from malt production– Ireland                 | NC_021514.1   | 3           |
| <i>L. plantarum</i> 5-2            | Fermented soybean- China                               | NZ_CP009236.1 | 4           |
| <i>L. plantarum</i> ATCC 8014      | Green olive fermentation- Spain                        | NZ_CP024413.1 | Unpublished |
| <i>L. plantarum</i> B21            | Vietnamese Fermented Sausage- Vietnam                  | NZ_CP010528.1 | 5           |
| <i>L. plantarum</i> BDGP2          | <i>Drosophila melanogaster</i> - United States         | NZ_CP023174.1 | 6           |
| <i>L. plantarum</i> C410L1         | Pit mud- China                                         | NZ_CP017954.1 | Unpublished |
| <i>L. plantarum</i> CAUH2          | Sichuan pickle vegetables– China                       | NZ_CP015126.1 | 7           |
| <i>L. plantarum</i> CLP0611        | Environment- South Korea                               | NZ_CP019722.1 | Unpublished |
| <i>L. plantarum</i> CMPG5300       | Vagina of healthy woman- <i>Homo sapiens</i> – Belgium | NZ_CM002918.1 | 8           |
| <i>L. plantarum</i> DF             | <i>Drosophila melanogaster</i> - Canada                | NZ_CP013753.1 | 9           |
| <i>L. plantarum</i> dm             | <i>Drosophila melanogaster</i> - United States         | NZ_CP022373.1 | 10          |
| <i>L. plantarum</i> DOMLa          | Probiotic potential– China                             | NZ_CP004406.1 | Unpublished |
| <i>L. plantarum</i> GB-LP1         | Traditional Korean Fermented Food- South Korea         | NZ_CP020564.1 | 11          |
| <i>L. plantarum</i> HFC8           | Faecal– <i>Homo sapiens</i> - India                    | NZ_CP012650.1 | 12          |
| <i>L. plantarum</i> JBE245         | Meju- South Korea                                      | NZ_CP014780.1 | 13          |
| <i>L. plantarum</i> JBE490         | Nuruk - South Korea                                    | NZ_CP020861.1 | Unpublished |
| <i>L. plantarum</i> JDM1           | Commercial LAB with several probiotic functions– China | NC_012984.1   | 14          |
| <i>L. plantarum</i> KC28           | Fermented Kimchi- South Korea                          | CP026743.1    | Unpublished |

|                                |                                             |               |             |
|--------------------------------|---------------------------------------------|---------------|-------------|
| <i>L. plantarum</i> KLDS1.0391 | Nuruk – South Korea                         | CP019348.1    | 15          |
| <i>L. plantarum</i> KP         | <i>Drosophila melanogaster</i> – Canada     | CP019348.1    | 9           |
| <i>L. plantarum</i> LM1004     | Napa cabbage kimchi- South Korea            | CP025988.1    | Unpublished |
| <i>L. plantarum</i> LP2        | Pickles– China                              | NZ_CP020816.1 | Unpublished |
| <i>L. plantarum</i> LP3        | Commercial dietary supplements- South Korea | NZ_CP017066.1 | Unpublished |
| <i>L. plantarum</i> LPL-1      | Fermented fish– China                       | NZ_CP021997.1 | 16          |
| <i>L. plantarum</i> LY-78      | Fermented chinese cabbage– China            | NZ_CP015308.1 | Unpublished |
| <i>L. plantarum</i> LZ206      | Cow milk– <i>Bos taurus</i> – China         | NZ_CP015966.1 | 17          |
| <i>L. plantarum</i> LZ227      | Cow milk– <i>Bos taurus</i> – China         | NZ_CP015857.1 | 18          |
| <i>L. plantarum</i> LZ95       | Faecal- <i>Homo sapiens</i> – China         | NZ_CP012122.1 | 19          |
| <i>L. plantarum</i> MF1298     | Fermented sausage– Norway                   | NZ_CP013149.1 | Unpublished |
| <i>L. plantarum</i> NCU116     | Chinese pickle– China                       | NZ_CP016071.1 | Unpublished |
| <i>L. plantarum</i> PC520      | Chinese fermented food pickles- China       | NZ_CP023772.1 | Unpublished |
| <i>L. plantarum</i> RI-113     | Fermented salami– Switzerland               | NZ_CP017406.1 | Unpublished |
| <i>L. plantarum</i> SRCM102022 | Food- South Korea                           | NZ_CP021501.1 | Unpublished |
| <i>L. plantarum</i> TMW 1.25   | Raw sausage– Germany                        | NZ_CP017354.1 | 20          |
| <i>L. plantarum</i> TMW 1.277  | Palm wine– Germany                          | NZ_CP017363.1 | 20          |
| <i>L. plantarum</i> TMW 1.708  | Raw sausage– Germany                        | NZ_CP017374.1 | 20          |
| <i>L. plantarum</i> TMW 1.1623 | Cow Milk– <i>Bos taurus</i> – Germany       | NZ_CP017379.1 | 20          |
| <i>L. plantarum</i> WCFS1      | Saliva– <i>Homo sapiens</i> – United States | NC_004567.2   | 21          |
| <i>L. plantarum</i> X7021      | Brine of stinky tofu- China                 | CP025412.1    | Unpublished |
| <i>L. plantarum</i> Zhang-LL   | Fermented rice- China                       | NZ_CP011769.1 | Unpublished |
| <i>L. plantarum</i> ZJ316      | Faecal- <i>Homo sapiens</i> – China         | NC_020229.1   | 22          |
| <i>L. plantarum</i> ZS2058     | Sauerkraut – China                          | NZ_CP012343.1 | 23          |

|                                                         |                                        |               |             |
|---------------------------------------------------------|----------------------------------------|---------------|-------------|
| <i>L. plantarum</i> subsp. <i>plantarum</i> BLS41       | Kimchi- South Korea                    | NZ_CP018209.1 | Unpublished |
| <i>L. plantarum</i> subsp. <i>plantarum</i> CGMCC 1.557 | Intestine- <i>Homo sapiens</i> – China | NZ_CP016270.1 | 24          |
| <i>L. plantarum</i> subsp. <i>plantarum</i> P-8         | Traditional dairy products– China      | NC_021224.2   | 25          |
| <i>L. plantarum</i> subsp. <i>plantarum</i> SRCM100434  | Food- South Korea                      | NZ_CP021528.1 | Unpublished |
| <i>L. plantarum</i> subsp. <i>plantarum</i> ST-III      | Kimchi- China                          | NC_014554.1   | 26          |
| <i>L. plantarum</i> subsp. <i>plantarum</i> TS12        | Stinky Tofu– Malaysia                  | NZ_CP018324.1 | Unpublished |

---

## References

1. Anukam KC, Macklaim JM, Gloor GB, Reid G, Boekhorst J: **Genome sequence of *Lactobacillus pentosus* KCA1: vaginal isolate from a healthy premenopausal woman.** *PLoS ONE*. 2013, 8:E59239.
2. El Halfawy NM, El-Naggar MY, Andrews SC: **Complete genome sequence of *Lactobacillus plantarum* 10CH, a potential probiotic lactic acid bacterium with potent antimicrobial activity.** *Genome Announc* 2017, 5: e01398-17.
3. Crowley S, Bottacini F, Mahony J, Van Sinderen Douwe: **Complete Genome Sequence of *Lactobacillus plantarum* strain 16, a broad-spectrum antifungal-producing lactic acid bacterium.** *Genome Announc* 2013, 1: e00533-13.

4. Liu CJ, Wang R, Gong FM, Liu XF, Zheng HJ, Luo YY, Li XR: **Complete genome sequences and comparative genome analysis of *Lactobacillus plantarum* strain 5-2 isolated from fermented soybean.** *Genomics* 2015, 106:404-411.
5. Golneshin A, Adetutu E, Ball AS, May BK, Van TT, Smith AT: **Complete Genome Sequence of *Lactobacillus plantarum* strain B21, a bacteriocin-producing strain isolated from Vietnamese fermented sausage nem chua.** *Genome Announc* 2015, 3: pii: e00055-15.
6. Kenneth H, Wan CY, Park S, Hammonds AS, Booth BW, Celniker SE: **Complete genome sequence of *Lactobacillus plantarum* Oregon-R-modENCODE strain BDGP2 isolated from *Drosophila melanogaster* gut.** *Genome Announc* 2017, 5: e01155-17.
7. Yang Y, Yin J, Liu J, Xu Q, Lan T, Ren F, Hao Y: **The copper homeostasis transcription factor copR is involved in H<sub>2</sub>O<sub>2</sub> stress in *Lactobacillus plantarum* CAUH2.** *Front Microbiol* 2017, 8:2015.
8. Malik S, Siezen RJ, Renckens B, Vaneechoutte M, Vanderleyden J, Lebeer S: **Draft genome sequence of *Lactobacillus plantarum* CMPG5300, a human vaginal isolate.** *Genome Announc* 2014, 2: e01149-14.

9. Petkau K, Fast D, Duggal A, Foley E: **Comparative evaluation of the genomes of three common *Drosophila*-associated bacteria.** *Biol Open* 2016, 5: 1305-1316.
10. Simhadri RK, Fast EM, Guo R, Schultz MJ, Vaisman N, Ortiz L, Bybee J, Slatko BE, Frydman HM: **The gut commensal microbiome of *Drosophila melanogaster* is modified by the endosymbiont Wolbachia.** *MSphere* 2017, 2: e00287-17.
11. Yu J, Ahn S, Kim K, Caetano-Anolles K, Lee C, Kang J, Cho K, Yoon SH, Kang DK, Kim H: **Comparative genomic analysis of *Lactobacillus plantarum* GB-LP1 isolated from traditional Korean fermented food.** *J Microbiol Biotechnol* 2017, 27:1419-1427.
12. Kumari M, Swarnkar MK, Kumar S, Singh AK, Gupta M: **Complete genome sequence of potential probiotic *Lactobacillus* sp. HFC8, isolated from human gut using PacBio SMRT sequencing.** *Genome Announc* 2015, 3:e01337-15.
13. Heo J, Uhm T: **Complete genome sequence of *Lactobacillus plantarum* JBE245 isolated from Meju.** *Kor. J. Microbiol* 2017, 53:344-346.

14. Zhang ZY, Liu C, Zhu YZ, Zhong Y, Zhu YQ, Zheng HJ, Zhao GP, Wang SY, Guo XK: **Complete genome sequence of *Lactobacillus plantarum* JDM1.** *J Bacteriol* 2009, 191:5020-1.
15. Jia FF, Zhang LJ, Pang XH, Gu XX, Abdelazez A, Liang Y, Sun SR, Meng XC: **Complete genome sequence of bacteriocin-producing *Lactobacillus plantarum* KLDS1.0391, a probiotic strain with gastrointestinal tract resistance and adhesion to the intestinal epithelial cells.** *Genomics* 2017, 109:432-437.
16. Wang Y, Shang N, Qin Y, Zhang Y, Zhang J, Li P: **The complete genome sequence of *Lactobacillus plantarum* LPL-1, a novel antibacterial probiotic producing class IIa bacteriocin.** *J Biotechnol* 2018, 266:84-88.
17. Li P, Gu Q, Zhou Q: **Complete genome sequence of *Lactobacillus plantarum* LZ206, a potential probiotic strain with antimicrobial activity against food-borne pathogenic microorganisms.** *J Biotechnol* 2016, 238:52-55.

18. Li P, Zhou Q, Gu Q: **Complete genome sequence of *Lactobacillus plantarum* LZ227, a potential probiotic strain producing B-group vitamins.** *J Biotechnol* 2016, 234:66-70.
19. Li P, Gu Q: **Complete genome sequence of *Lactobacillus plantarum* LZ95, a potential probiotic strain producing bacteriocins and B-group vitamin riboflavin.** *J Biotechnol* 2016, 229:1-2.
20. Kafka TA, Geissler AJ, Vogel RF: **Multiple genome sequences of *Lactobacillus plantarum* strains.** *Genome Announc* 2017, 5: e00654-17.
21. Siezen RJ, Francke C, Renckens B, Boekhorst J, Wels M, Kleerebezem M, Van Hijum SA: **Complete resequencing and reannotation of the *Lactobacillus plantarum* WCFS1 genome.** *J. Bacteriol* 2012, 194:195-196.
22. Li X, Gu Q, Lou X, Zhang X, Song D, Shen L, Zhao Y: **Complete genome sequence of the probiotic *Lactobacillus plantarum* strain ZJ316.** *Genome Announc* 2013, 1:E0009413.

23. Yang B, Chen H, Tian F, Zhao J, Gu Z, Zhang H, Chen YQ, Chen W: **Complete genome sequence of *Lactobacillus plantarum* ZS2058, a probiotic strain with high conjugated linoleic acid production ability.** *J Biotechnol* 2015, 214:212-213.
24. Ren D, Li C, Qin Y, Yin R, Du S, Ye F, Liu C, Liu H, Wang M, Li Y, Sun Y, Li X, Tian M, Jin N: **In vitro evaluation of the probiotic and functional potential of *Lactobacillus* strains isolated from fermented food and human intestine.** *Anaerobe* 2014, 30:1e10.
25. Zhang W, Sun Z, Bilige M, Zhang H: **Complete genome sequence of probiotic *Lactobacillus plantarum* P-8 with antibacterial activity.** *J Biotechnol* 2015, 193:41-42.
26. Wang Y, Chen C, Ai L, Zhou F, Zhou Z, Wang L, Zhang H, Chen W, Guo B: **Complete genome sequence of the probiotic *Lactobacillus plantarum* ST-III.** *J. Bacteriol* 2011, 193:313-314.
