# Supplementary material for: Comparative Genomic Analysis ofLactobacillus plantarum: An Overview
Source: Hindawi journal article supplement (doi:10.1155/2019/4973214), 2019-04-10
Supplement: f3 [file 4973214.f3.pdf]

Table S3. CRISPR sequences obtained by CrisprFinder.

| Strain  | Start–end       | Length (bp) | Consensus Sequence                          | Spacer sequences                                                                                                                                                                                                                                                                                                                                  |
|---------|-----------------|-------------|---------------------------------------------|---------------------------------------------------------------------------------------------------------------------------------------------------------------------------------------------------------------------------------------------------------------------------------------------------------------------------------------------------|
| CLP0611 | 114992-115687   | 695         | <b>GTCTTGAATAGTAGTCATATCAAACAGGTTTAGAAC</b> | CAACAGACTCCTGCTGGGGTTGCCTCAGTT<br>TCGAATTAATGCTGACGCCCAGTTATTGAT<br>AAACGTCTTTAGCGTAGTCATTTCATTGGCT<br>AAACACCGTTAACGGTCTTACCGTGTCGAT<br>ACGTCGGCGAAATCTTCACCACGCCGATTA<br>TTGATGACTCTTCTGGGGCACCAACAAGTT<br>TATTGAGTGCAGCGTTGTTTGCGAGCGTCC<br>GTACAGTGTCGCTCAACGTCTATCACTCCC<br>GGTATGGAGTACAACAAGGAACAAGACACG<br>GATGCTGAGGAAACGAAGCATAGAACGTTT |
| LY-78   | 1823736-1824036 | 300         | <b>GTTCTAAACCTGTTTGATATGACTACTATTCAAGAC</b> | AAACGTTCTATGCTTCGTTTCCTCAGCATC<br>TAATCGGCGTGGTGAAGATTTCCGCCGACGT<br>AGCCAATGAATGACTACGCTAAAGACGTTT<br>TACGGTACTCAATTACGATTAGATAATACAA                                                                                                                                                                                                            |
| LZ206   | 2416755-2417252 | 497         | <b>GTTCTAAACCTGTTTGATATGACTACTATTCAAGAC</b> | AAACGTTCTATGCTTCGTTTCCTCAGCATC<br>CGTAAATAGGTTGTAAACGTTTCAGGTCTGA<br>TAATACGATCCATTGACTCCGCTAGTGACA<br>TATTCTCGTTTATCGCTTTTAGACGTGTTA<br>GTTTGGACTGGTTTATCAAGCAACAAGTTG<br>AAGCGCGGGATCACGTGCAACAGCACCATC<br>ACGTCGGCAAACGTTCGAATCCTTGACAT                                                                                                        |
| LZ227   | 2311451-2312014 | 563         | <b>GTTCTAAACCTGTTTGATATGACTACTATTCAAGAC</b> | AAACGTTCTATGCTTCGTTTCCTCAGCATC<br>GGCATGTTAGTAGTTTAGGCGCCCTCCAAA                                                                                                                                                                                                                                                                                  |

TGCTTTCGTTTTTAAGTTGTCCGCCTAACT  
TCGCGCCGCGAAACATTGGACAGACTTAGT  
TGATCAAACAGTTTATAACAAGTTAAAAGA  
AGAAGATATATGTTCCAGATACTAATTCTG  
TGGTTACGACGCGTGGGGGCTAACGCCTAC  
GATGATGAGCGTATGATTCAGCAAGCCATG

|        |               |      |                                             |                                                                                                                                                                                                                                                                                                                                                                                                                                                                                                                                                                                                                                                                                                                                                                          |
|--------|---------------|------|---------------------------------------------|--------------------------------------------------------------------------------------------------------------------------------------------------------------------------------------------------------------------------------------------------------------------------------------------------------------------------------------------------------------------------------------------------------------------------------------------------------------------------------------------------------------------------------------------------------------------------------------------------------------------------------------------------------------------------------------------------------------------------------------------------------------------------|
| MF1298 | 116735-118846 | 2111 | <b>GTCTTGAATAGTAGTCATATCAAACAGGTTTAGAAC</b> | AAAATGGATTTCTGAGCATTACTGTCCGAC<br>GACTATACCAATGAGGTCGAAGCATGGTTA<br>CACAAGGCCACCGAGGAAGCCGGCGAGCTA<br>TAGGTTTACTCATGGTAAATCCTCCTATGT<br>AAAATAAATTTAAGGTTGCGCAACACAATG<br>AACTCATCATAAATGACGTCTTTTACCGAG<br>TTAGGTTGAGCTGGATCGGGATCAGGATCG<br>TCTGTTGTTTAATTTGTTTTAGATTGTTAC<br>ACTAAAGCCGGGTATACAGCCCCGAAGAA<br>AAAATAGTTTCGACGAAAAAGCCGAAAGAGA<br>GCGGCCACGACCGCCATGGGTGTCAGCGCC<br>TCGGATAACTTAGCGGCGGCGTATCCCTGC<br>ATAGTGACAGCATCTGTTTTCGGACCAATC<br>GAGGCTTGCACTAGTGAGTTCAATCGTTAT<br>TGTCCATACGAGCAGCGTTGGCACTTATTC<br>GTATTATTATCAACGTCCCGCATTGCGTTA<br>AGGATATATGAAATTAGTACATGTACTAGT<br>ACGTCTTTCAGCCCAGTAACTGCTCAAGT<br>TTGAATACCATTCCCTTGTTTATACTCCATC<br>AGTTCATAATCATATGATCTAAGTGACGGT<br>GGCCGGGTAAATCTTAATGTTTTATGTTCT<br>CAATCAGAAAGAAGATGACGACTATAATGC |
|--------|---------------|------|---------------------------------------------|--------------------------------------------------------------------------------------------------------------------------------------------------------------------------------------------------------------------------------------------------------------------------------------------------------------------------------------------------------------------------------------------------------------------------------------------------------------------------------------------------------------------------------------------------------------------------------------------------------------------------------------------------------------------------------------------------------------------------------------------------------------------------|

GACTTATACCAGCAGTACCGAAGACGGTTA  
AACTGGGAGCGGTCAACACCCCAGGCTGTG  
ACGCAAAGCCAGCCCTAGTCATGAGGTCAT  
GTTGCAACTTTATCCTTGTCACTTTCAACA  
CAATACCATAGTAGTCAATTATTACACGTCG

TCTTGAATAGTAGTCAATTATTACACGTC  
GCCAAACAACATTGCAGAGAGCTAGTGCTT  
GTGACGTGCTCCCATGTGACCCGAATTGAC  
CGACTCTAATGGATATTTTCAATCATAGCA  
GATGGTGCTGTTGCACGTGATCCCGCGCTT

|       |               |     |                                             |                                                                                                                                                                                                         |
|-------|---------------|-----|---------------------------------------------|---------------------------------------------------------------------------------------------------------------------------------------------------------------------------------------------------------|
| ZJ316 | 359930-360361 | 431 | <b>GTCTTGAATAGTAGTCATATCAAACAGGTTTAGAAC</b> | ATGTCAAGGATTGGAACAGTTTGCCGACGT<br>CTTGAAGAAGTTAAGGCACAACTCCAACG<br>TAACACGTCTAAAAGCGATAAACGAGAATA<br>TGTCACTAGCGGAGTCAATGGATCGTATTA<br>TCAGACCTGAACGTTTACAACCTATTTACG<br>GATGCTGAGGAAACGAAGCATAGAACGTTT |
|-------|---------------|-----|---------------------------------------------|---------------------------------------------------------------------------------------------------------------------------------------------------------------------------------------------------------|

|        |                 |     |                                             |                                                                                                                                                                                                                                                                                                                                                   |
|--------|-----------------|-----|---------------------------------------------|---------------------------------------------------------------------------------------------------------------------------------------------------------------------------------------------------------------------------------------------------------------------------------------------------------------------------------------------------|
| ZS2058 | 2563734-2564693 | 959 | <b>GTCTTGAATAGTAGTCATATCAAACAGGTTTAGAAC</b> | GACGAAATTACAAAAGACCGTCATAAGCGT<br>CGGCAAGTAATCAGCTAGGAGGTTTCGCGCC<br>TATGGAATGGGTCAAGTTTTTCACTCAATC<br>AATGATTATGTGGACGAACATAATCAGATG<br>ACGCTATGCGTTCGTATGTAGCAACTCATA<br>TGTCGCGCTGCGCATTAGCCGTAATCAACT<br>CCACCAGTTATCGCGATTACTTAACTTATT<br>GCCTAGGTCAAGAACTAACTAAAGAGTTAG<br>TGTCACTTTCTAATGAACTTGCAACCATCA<br>CCGGTCGCCACCGGGACAAGCCCACAAAGA |
|--------|-----------------|-----|---------------------------------------------|---------------------------------------------------------------------------------------------------------------------------------------------------------------------------------------------------------------------------------------------------------------------------------------------------------------------------------------------------|

ACATTGATGACTATTTTCGGCAAAGAATATT  
AACACTAGTAAATTGCCACATGGCAATGTC  
AATGCCAGTCCTTTGTATTCACTTTTGTTA  
GATGCTGAGGAAACGAAGCATAGAACGTTT

|             |                 |     |                                             |                                                                                                                                                                                                                                                                                                                 |
|-------------|-----------------|-----|---------------------------------------------|-----------------------------------------------------------------------------------------------------------------------------------------------------------------------------------------------------------------------------------------------------------------------------------------------------------------|
| CGMCC 1.557 | 2774673-2775303 | 630 | <b>GTCTTGAATAGTAGTCATATCAAACAGGTTTAGAAC</b> | TTGAAGTCCCAGCCGTGAACCAGTTAATGA<br>TCAAATTAAGAATGCCGTAGCCACAATTAC<br>GGACGCATCGGGGTATATTGCTGACGAAGA<br>AGAACGGTACGTATGAGTTAACACCTAAAT<br>TTGTATTATCTAATCGTAATTGAGTACCGTA<br>GCTATACTATAAACATATATAAGGAAAGGA<br>GATTAAATGCAAGTACTGTCTTTTCAATAT<br>ACGTCGGCGAAATCTTCACCACGCCGATTA<br>GATGCTGAGGAAACGAAGCATAGAACGTTT |
|-------------|-----------------|-----|---------------------------------------------|-----------------------------------------------------------------------------------------------------------------------------------------------------------------------------------------------------------------------------------------------------------------------------------------------------------------|

|      |                 |     |                                             |                                                                                                                                                                                                                                                                                                                                                 |
|------|-----------------|-----|---------------------------------------------|-------------------------------------------------------------------------------------------------------------------------------------------------------------------------------------------------------------------------------------------------------------------------------------------------------------------------------------------------|
| TS12 | 2154877-2155571 | 694 | <b>GTCTTGAATAGTAGTCATATCAAACAGGTTTAGAAC</b> | GATTCTAGTTCGCTTTGCTGAGCCTTAAGA<br>CACGGACGCTCTACACATTCATGCCGTCAT<br>CTAACCAAATTTATCTGTTTGGAATGGAG<br>CTTCTAGTCCATGTTTTTGTACGATTTTCAT<br>TAAGACCCCCAAGATACCGGCGGCCGCTTG<br>TTAAGTGTTTTAGCACAACTCCAATTTATT<br>TAAACCGCAGCAGTAACGTATGCACGAAC<br>TACAACAATAGCAGCCGTGCCACAAGTTGT<br>AGTTTTCTTTACCAACGAACCCAATACCAC<br>GCGTTGACGAGCTTTAATCTCTCACGCAAC |
|------|-----------------|-----|---------------------------------------------|-------------------------------------------------------------------------------------------------------------------------------------------------------------------------------------------------------------------------------------------------------------------------------------------------------------------------------------------------|

---
