# Supplementary material for: Comparative Genomic Analysis ofLactobacillus plantarum: An Overview
Source: Hindawi journal article supplement (doi:10.1155/2019/4973214), 2019-04-10
Supplement: f4 [file 4973214.f4.pdf]

Table S4. Orthologous genes shared between *L. plantarum* WCFS1 and other thirty-nine strains on region 2 of the lifestyle island. Strains showed less than 10 OGs were not represented.

| Organism name                                           | OGs | G+C % |
|---------------------------------------------------------|-----|-------|
| <i>L. plantarum</i> 10CH                                | 31  | 43.4  |
| <i>L. plantarum</i> 5-2                                 | 56  | 41.7  |
| <i>L. plantarum</i> ATCC 8014                           | 65  | 41.8  |
| <i>L. plantarum</i> B21                                 | 56  | 41.8  |
| <i>L. plantarum</i> BDGP2                               | 38  | 41.3  |
| <i>L. plantarum</i> C410L1                              | 17  | 44.9  |
| <i>L. plantarum</i> CAUH2                               | 39  | 41.3  |
| <i>L. plantarum</i> CLP0611                             | 31  | 40.8  |
| <i>L. plantarum</i> DF                                  | 39  | 41.3  |
| <i>L. plantarum</i> dm                                  | 39  | 41.3  |
| <i>L. plantarum</i> DOMLa                               | 65  | 41.9  |
| <i>L. plantarum</i> GB-LP1                              | 24  | 44.1  |
| <i>L. plantarum</i> HFC8                                | 20  | 44.8  |
| <i>L. plantarum</i> JBE245                              | 56  | 41.7  |
| <i>L. plantarum</i> JBE490                              | 14  | 43.8  |
| <i>L. plantarum</i> JDM1                                | 65  | 41.9  |
| <i>L. plantarum</i> KLDS1.0391                          | 20  | 44.2  |
| <i>L. plantarum</i> KP                                  | 39  | 41.3  |
| <i>L. plantarum</i> LM1004                              | 28  | 44.2  |
| <i>L. plantarum</i> LP3                                 | 42  | 40.2  |
| <i>L. plantarum</i> LPL-1                               | 34  | 40.2  |
| <i>L. plantarum</i> LY-78                               | 30  | 41.1  |
| <i>L. plantarum</i> LZ206                               | 24  | 44.1  |
| <i>L. plantarum</i> LZ227                               | 24  | 44.1  |
| <i>L. plantarum</i> MF1298                              | 31  | 43.4  |
| <i>L. plantarum</i> NCU116                              | 59  | 41.6  |
| <i>L. plantarum</i> PC520                               | 39  | 41.3  |
| <i>L. plantarum</i> SRCM102022                          | 60  | 41.6  |
| <i>L. plantarum</i> TMW 1.25                            | 25  | 44.3  |
| <i>L. plantarum</i> TMW 1.277                           | 25  | 44.3  |
| <i>L. plantarum</i> TMW 1.708                           | 28  | 42.9  |
| <i>L. plantarum</i> TMW 1.1623                          | 55  | 41.6  |
| <i>L. plantarum</i> WCFS1                               | 179 | 41.9  |
| <i>L. plantarum</i> X7021                               | 28  | 40.2  |
| <i>L. plantarum</i> Zhang-LL                            | 18  | 43.4  |
| <i>L. plantarum</i> ZJ316                               | 24  | 44.1  |
| <i>L. plantarum</i> ZS2058                              | 37  | 40.5  |
| <i>L. plantarum</i> subsp. <i>plantarum</i> CGMCC 1.557 | 31  | 40.8  |
| <i>L. plantarum</i> subsp. <i>plantarum</i> P-8         | 24  | 44.4  |

*L. plantarum* subsp. *plantarum* TS12

38

41.4
